# Supplementary material for: Involvement of autophagy in the outcome of mitotic catastrophe
Source: PubMed Central journal article supplement (PMC5674033; doi:10.1038/s41598-017-14901-z), 2017-11-06
Supplement: 41598_2017_14901_MOESM5_ESM.pdf [file 41598_2017_14901_MOESM5_ESM.pdf]

## **Supplementary Information**

### **Involvement of autophagy in the outcome of mitotic catastrophe**

Irina V. Sorokina<sup>1</sup>, Tatiana V. Denisenko<sup>1</sup>, Gabriela Imreh<sup>2,3</sup>, Pyotr A. Tyurin-Kuzmin<sup>1</sup>,  
Vitaliy O Kaminsky<sup>2</sup>, Vladimir Gogvadze<sup>1,2</sup>, and Boris Zhivotovsky<sup>1,2,\*</sup>

<sup>1</sup>Faculty of Fundamental Medicine, MV Lomonosov Moscow State University, 11999

Moscow, Russia;

<sup>2</sup>Division of Toxicology, Institute of Environmental Medicine, Karolinska Institutet, Box 210,

17177 Stockholm, Sweden;

<sup>3</sup>Present address: Department of Biosciences and Nutrition, Karolinska Institutet, 17177

Stockholm, Sweden

\*Corresponding author:

Institute of Environmental Medicine

Karolinska Institutet

Box 210

17177 Stockholm

Sweden

Boris.Zhivotovsky@ki.se

**This file includes:**

**Supplementary Figures 1-4**

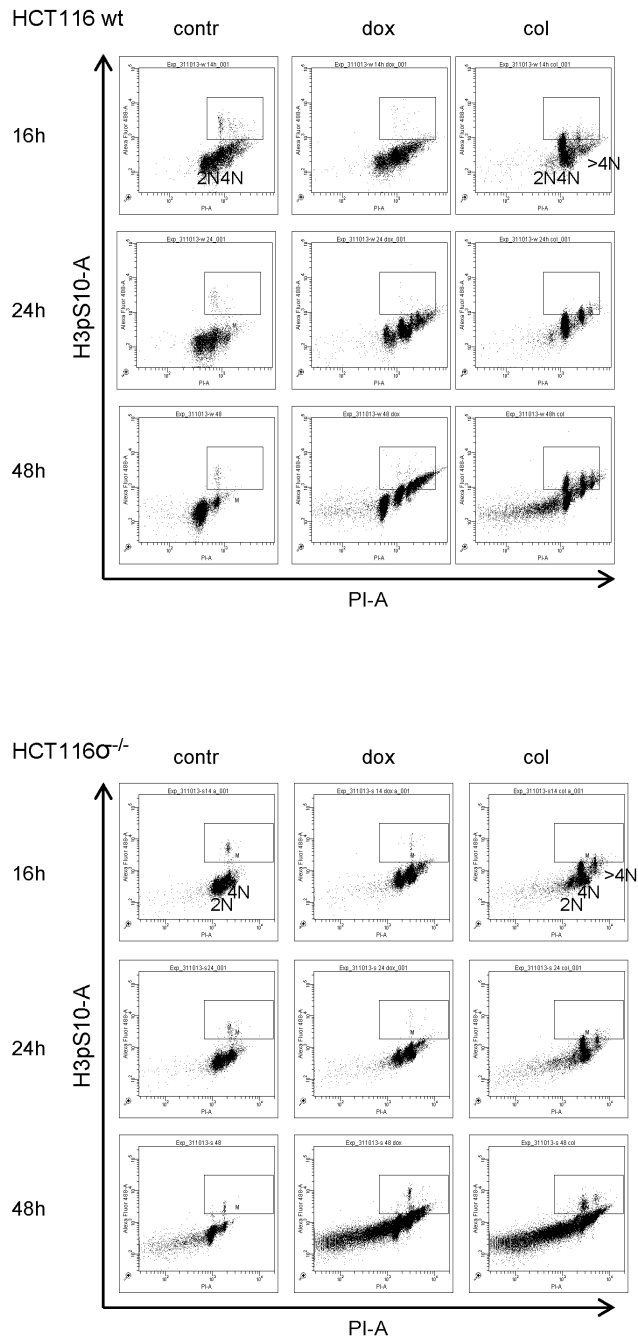

**Figure S1.**

**Polyplodization occurs during MC.** Representative images of the time-dependent polyplodity appearance (>4N cells) after treatment with doxorubicin or colcemid. Assay for the simultaneous detection of diploid and tetraploid cells by PI and cells in mitosis by an antibody against H3Sp10 (specific marker Ser-10- phosphorylated histone H3).

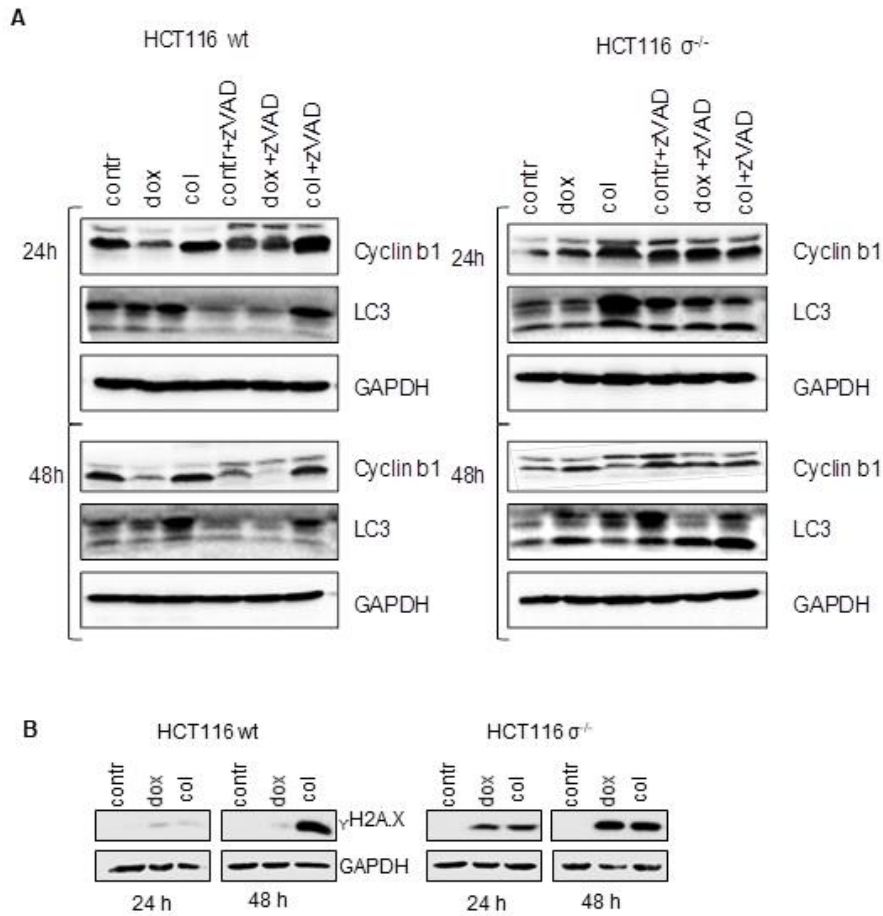

**Figure S2.**

**Crosstalk between MC, autophagy and apoptosis. A** – HCT116 and HCT116  $\sigma^{-/-}$  cells were treated with zVAD-FMK (40  $\mu$ M), 1h after doxorubicin (600 nM) or colcemid (0.1  $\mu$ g/ml) was added. Cell lysates were probed by western for cleavage of LC3 and level of cyclin B1. GAPDH was used as a loading control. **B** - Assessment of  $\gamma$ H2A.X accumulation in HCT116 and HCT116  $\sigma^{-/-}$  after MC stimulation. GAPDH was used as a loading control.

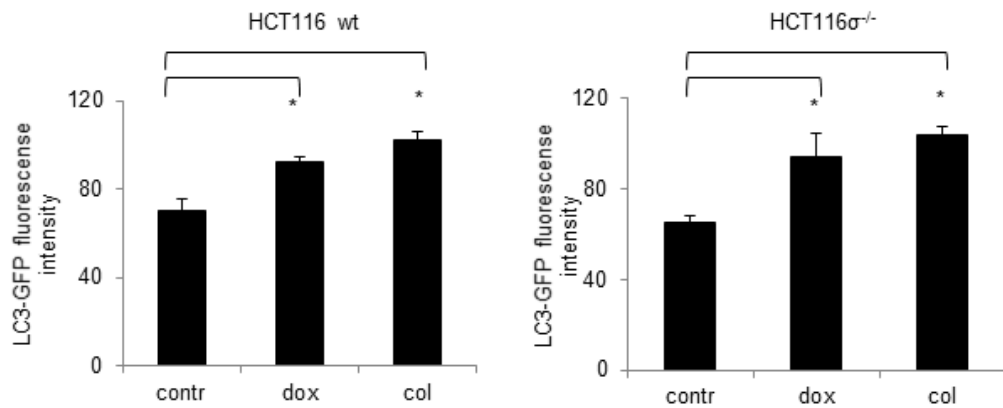

**Figure S3.**

**MC stimulation promotes autophagy flux in HCT116 cells.** HCT116 wt and HCT116  $\sigma^{-/-}$  cells were transfected with pET28a-LC3-GFP plasmid, after 6h they were co-treated with pepstatin A (5  $\mu\text{g/ml}$ ) and E64D (2  $\mu\text{g/ml}$ ). After 1h, doxorubicin (600 nM) or colcemid (0.1  $\mu\text{g/ml}$ ) were added. The cells were analyzed by live-imaging for 3 days at 10 $\times$  magnification; scale bar, 20  $\mu\text{m}$ . Each cell population calculated in the nine different fields of view. Bar chart represents the quantitation of autophagic cells with of maximum LC3-GFP fluorescence ranges. \* $p < 0.05$  (U test)

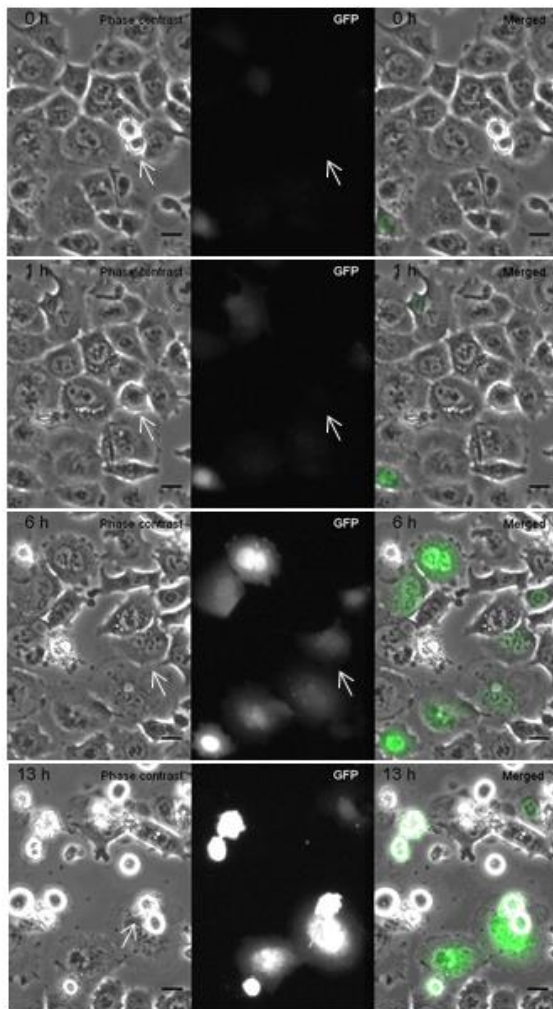

HCT116 $\sigma^{-}$ dox

S4A

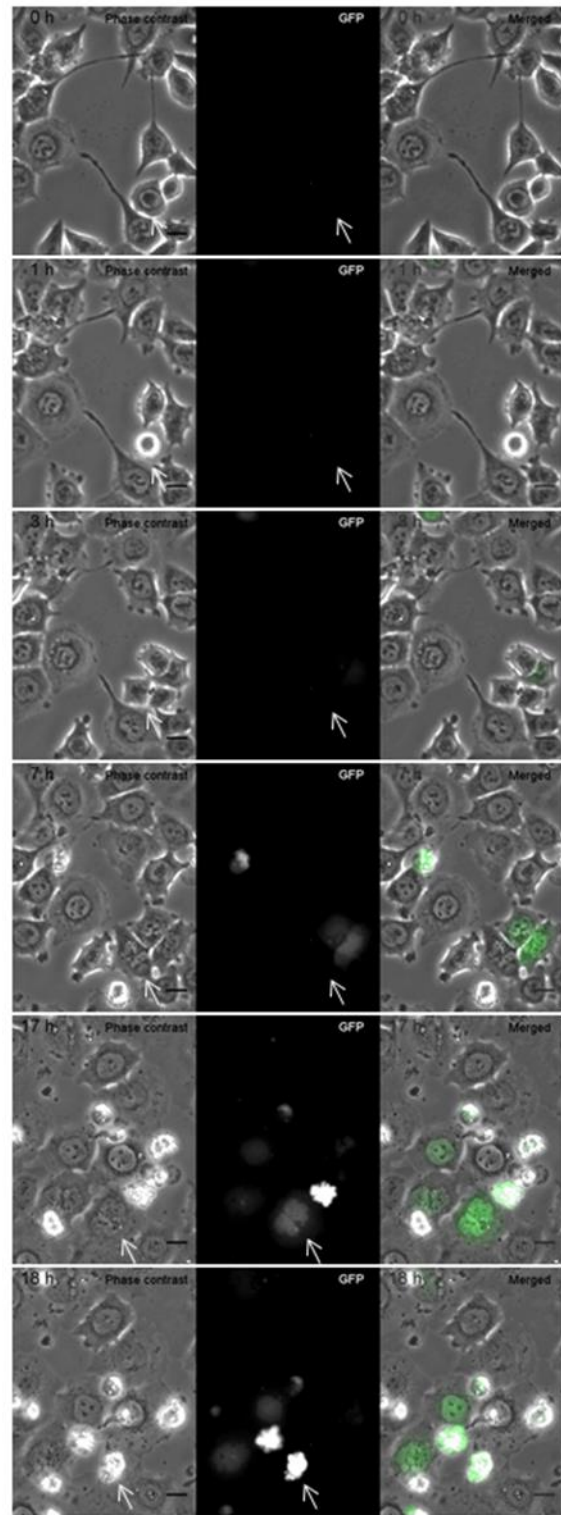

HCT116 $\sigma^{-}$ col

S4B

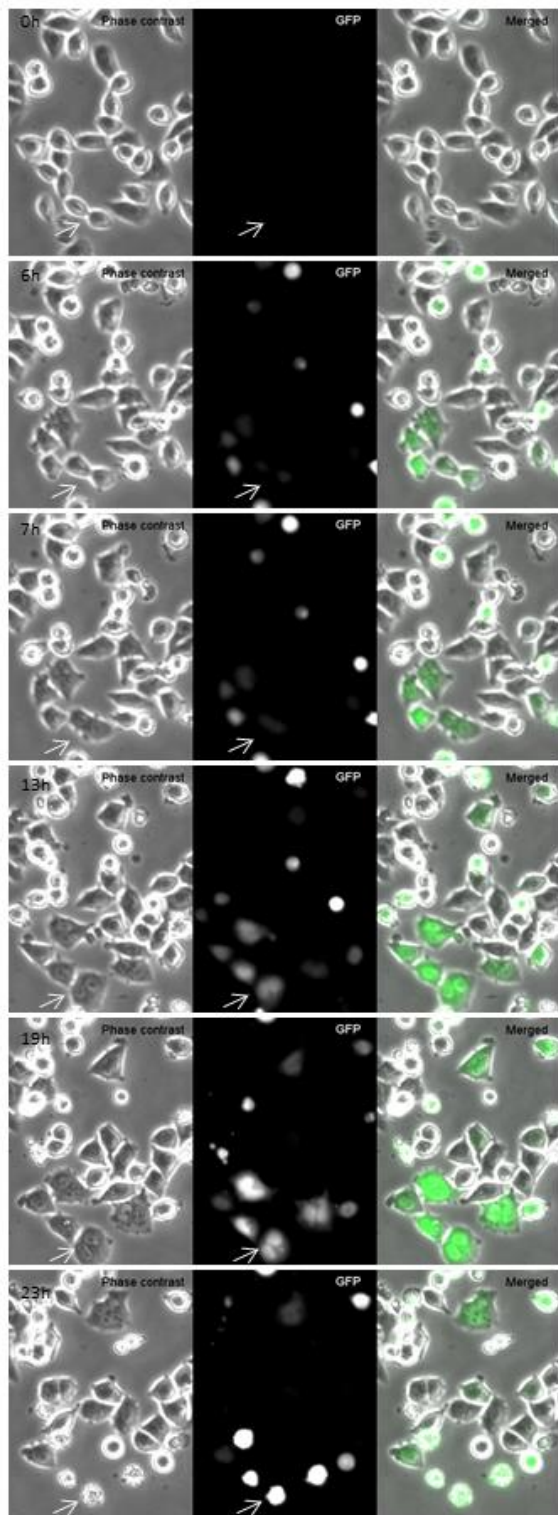

S4C HCT116 wt dox

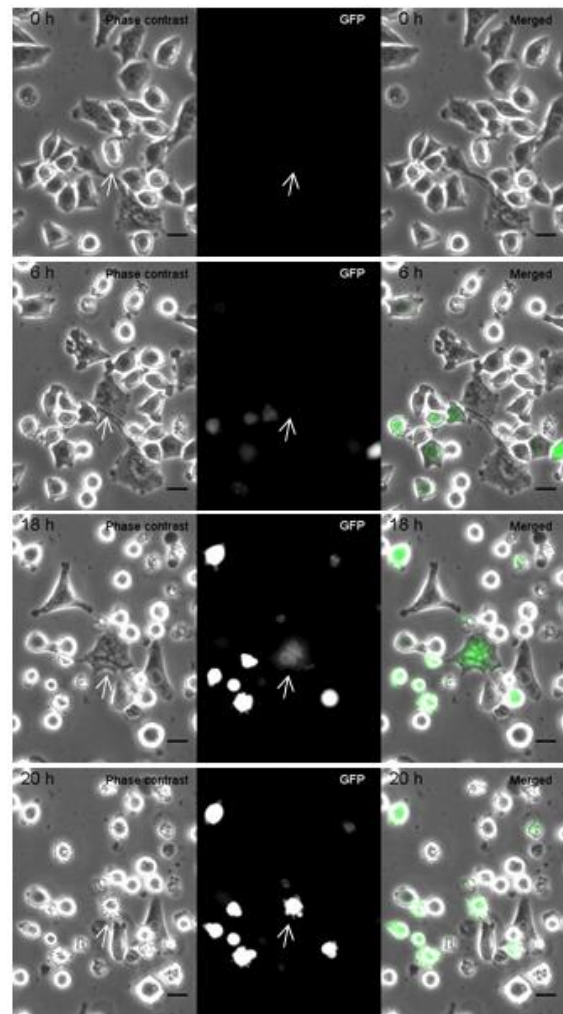

S4D HCT116 wt col

**Figure S4.**

**Storyboard of live-imaging movies of cells undergoing MC followed by autophagy and apoptosis.** HCT116  $\sigma^{-/-}$  (**A, B**) and HCT116 wt cells (**C, D**) were transfected with pET28a-LC3-GFP plasmid. After 6h they were co-treated with lysosomal inhibitors pepstatin A (5  $\mu\text{g/ml}$ ) and E64D (2  $\mu\text{g/ml}$ ). One hour later, cells were treated with doxorubicin (600 nM) (**A, C**) or colcemid (0.1  $\mu\text{g/ml}$ ) (**B, D**). White arrows point to cells undergoing division followed by MC. The MC stimulation promotes appearance of LC3-GFP puncta formation. MC progression and subsequent autophagy resulted in stimulation of apoptotic cell death. Live imaging of cultured cells was performed at 10 $\times$  magnification; scale bar, 20  $\mu\text{m}$ .
