# Supplementary material for: Involvement of autophagy in the outcome of mitotic catastrophe
Source: PubMed Central journal article supplement (PMC5674033; doi:10.1038/s41598-017-14901-z), 2017-11-06
Supplement: 41598_2017_14901_MOESM6_ESM.pdf [file 41598_2017_14901_MOESM6_ESM.pdf]

## Supplementary Information

### Involvement of autophagy in the outcome of mitotic catastrophe

Irina V. Sorokina<sup>1</sup>, Tatiana V. Denisenko<sup>1</sup>, Gabriela Imreh<sup>2,3</sup>, Pyotr A. Tyurin-Kuzmin<sup>1</sup>,  
Vitaliy O Kaminsky<sup>2</sup>, Vladimir Gogvadze<sup>1,2</sup>, and Boris Zhivotovsky<sup>1,2,\*</sup>

<sup>1</sup>Faculty of Fundamental Medicine, MV Lomonosov Moscow State University, 11999

Moscow, Russia;

<sup>2</sup>Division of Toxicology, Institute of Environmental Medicine, Karolinska Institutet, Box 210,

17177 Stockholm, Sweden;

<sup>3</sup>Present address: Department of Biosciences and Nutrition, Karolinska Institutet, 17177

Stockholm, Sweden

\*Corresponding author:

Institute of Environmental Medicine

Karolinska Institutet

Box 210

17177 Stockholm

Sweden

[Boris.Zhivotovsky@ki.se](mailto:Boris.Zhivotovsky@ki.se)

**This file includes:**

**Legends to Movies 1-4**

**Movie 1.**

Live-imaging of HCT116  $\sigma^{-/-}$  cells treated with 600 nM doxorubicin undergoing MC followed by autophagy and apoptosis in the presence of pepstatin A (5  $\mu\text{g/ml}$ ) and E64D (2  $\mu\text{g/ml}$ ).

**Movie 2.**

Live-imaging of HCT116  $\sigma^{-/-}$  cells treated with 0.1  $\mu\text{g/ml}$  colcemid undergoing MC followed by autophagy and apoptosis in the presence of pepstatin A (5  $\mu\text{g/ml}$ ) and E64D (2  $\mu\text{g/ml}$ ).

**Movie 3.**

Live-imaging of HCT116 wt cells treated with 600 nM doxorubicin undergoing MC followed by autophagy and apoptosis in the presence of pepstatin A (5  $\mu\text{g/ml}$ ) and E64D (2  $\mu\text{g/ml}$ ).

**Movie 4.**

Live-imaging of HCT116 wt cells treated with 0.1  $\mu\text{g/ml}$  colcemid undergoing MC followed by autophagy and apoptosis in the presence of pepstatin A (5  $\mu\text{g/ml}$ ) and E64D (2  $\mu\text{g/ml}$ ).
